# Supplementary material
Source: ML conference proceedings conference paper supplement (https://proceedings.mlr.press/v89/chen19d.html)
Supplement: Supplementary file [file chen19d-supp.pdf]

---

# Adaptive Gaussian copula ABC

## – Supplementary Materials –

---

Yanzhi Chen  
The University of Edinburgh

Michael U. Gutmann  
The University of Edinburgh

### A Contour plots of the residuals in each problem

#### A.1 Gaussian copula toy problem

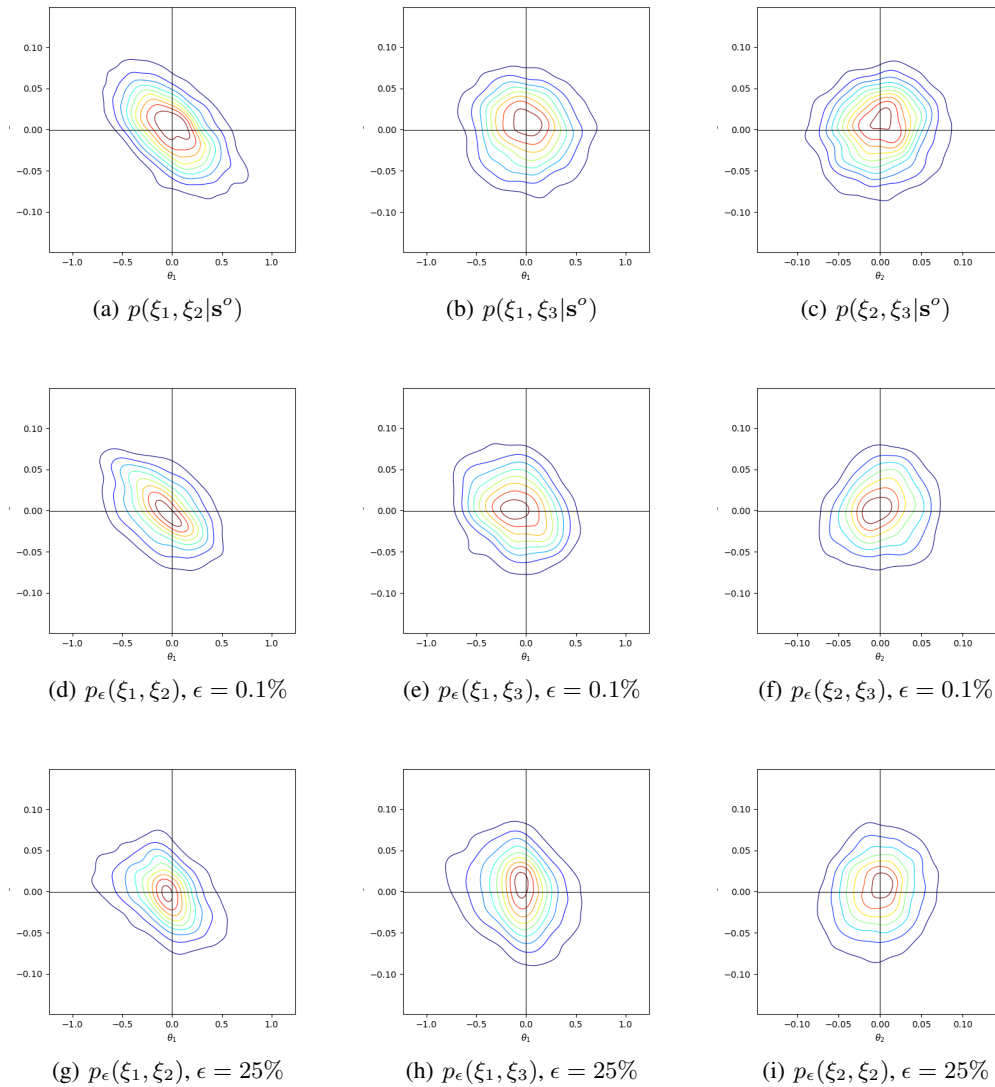

Figure 1: Gaussian copula toy problem: visualizing the distribution of the residuals at  $\mathbf{s}^o$  and the distribution  $p_\epsilon(\boldsymbol{\xi})$  of the residuals within  $\epsilon$ -balls of different radii.

## A.2 M/G/1 problem

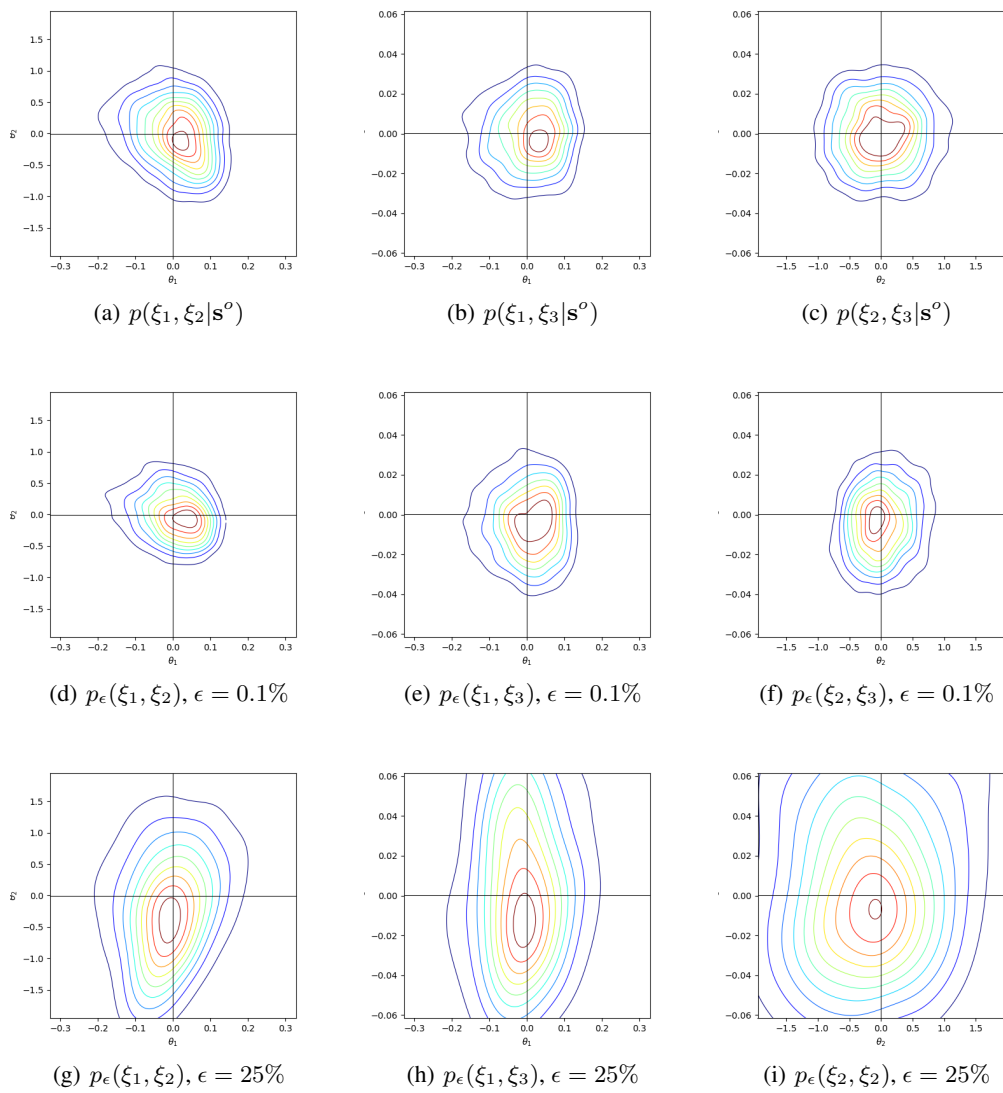

Figure 2: M/G/1 problem: visualizing the distribution of the residuals at  $\mathbf{s}^o$  and the distribution  $p_\epsilon(\boldsymbol{\xi})$  of the residuals within  $\epsilon$ -balls of different radii.

### A.3 MA(2) problem

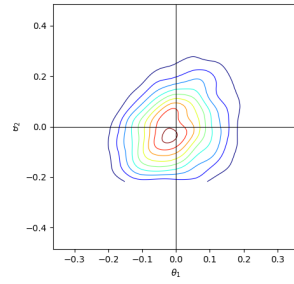

(a)  $p(\xi_1, \xi_2 | \mathbf{s}^o)$

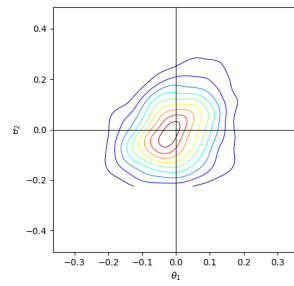

(b)  $p_\epsilon(\xi_1, \xi_2), \epsilon = 0.1\%$

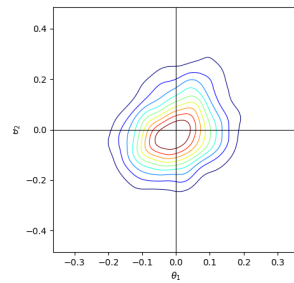

(c)  $p_\epsilon(\xi_1, \xi_2), \epsilon = 25\%$

Figure 3: MA(2): visualizing the distribution of the residuals at  $\mathbf{s}^o$  and the distribution  $p_\epsilon(\boldsymbol{\xi})$  of the residuals within  $\epsilon$ -balls of different radii.

#### A.4 Lotka-Volterra problem

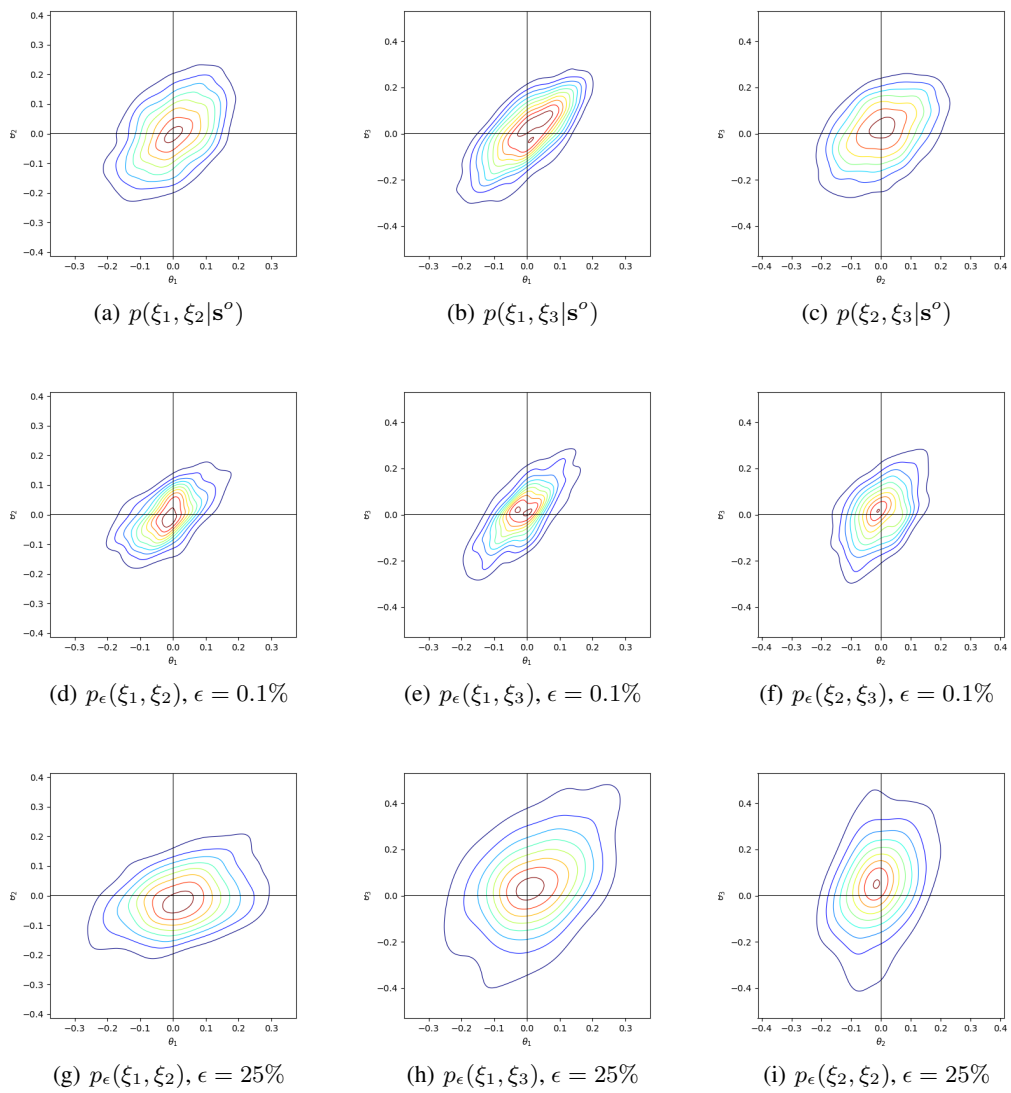

Figure 4: Lotka-Volterra problem: visualizing the distribution of the residuals at  $\mathbf{s}^o$  and the distribution  $p_\epsilon(\boldsymbol{\xi})$  of the residuals within  $\epsilon$ -balls of different radii.

## B Contour plots of approximate posterior learned by each method in MA(2)

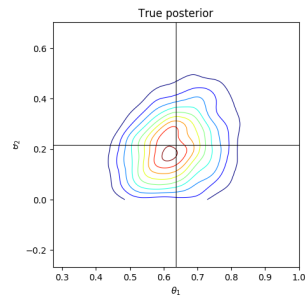

(a) True posterior

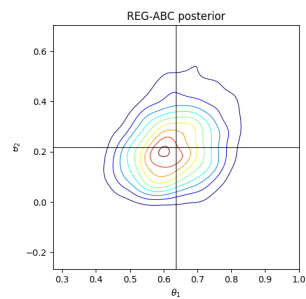

(b) REG-ABC posterior

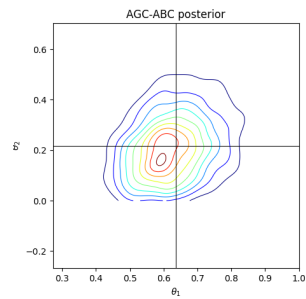

(c) AGC-ABC posterior

Figure 5: MA2 problem: the contour plots of the posteriors learned in each method with simulation budget  $N = 2,500$ .
